# Supplementary material for: Leptospira interrogans biofilm formation in Rattus norvegicus (Norway rats) natural reservoirs
Source: PubMed Central journal article supplement (PMC8451993; doi:10.1371/journal.pntd.0009736), 2021-09-08
Supplement: pntd.0009736.s003.pdf [file pntd.0009736.s003.pdf]

|                                                                                    | Alcian Blue Stain | Mucicarmine Stain |
|------------------------------------------------------------------------------------|-------------------|-------------------|
| Rats positive for <i>Leptospira</i> infection by immunohistochemistry (IHC) (n=65) | Positive (n=24)*  | Negative          |
| Rats negative for <i>Leptospira</i> infection                                      | Negative          | Negative          |
| Dog intestine (positive control)                                                   | Positive          | Positive          |

\* Positive in co-localization.
